# Supplementary material for: Association of epigenetic age acceleration with MRI biomarkers of aging and Alzheimer’s disease neurodegeneration
Source: publisher site journal article supplement (doi:10.18632/aging.206369), 2026-04-07
Supplement: Supplementary file [file aging-v18i1-206369-supplementary-material-SD4.pdf]

**Supplementary Table 2. Associations of each epigenetic clock with SPARE-BAA in progressively adjusted models.**

| Epigenetic clock | SD   | Model | $\beta$ (95% CI)    | p    |
|------------------|------|-------|---------------------|------|
| IEAA             | 5.05 | 1     | -0.07 (-0.47, 0.34) | 0.75 |
|                  |      | 2     | -0.11 (-0.52, 0.29) | 0.59 |
|                  |      | 3     | -0.14 (-0.55, 0.27) | 0.50 |
|                  |      | 4     | -0.14 (-0.54, 0.27) | 0.52 |
| EEAA             | 6.15 | 1     | -0.01 (-0.41, 0.40) | 0.97 |
|                  |      | 2     | -0.08 (-0.49, 0.33) | 0.70 |
|                  |      | 3     | -0.09 (-0.50, 0.31) | 0.65 |
|                  |      | 4     | -0.12 (-0.53, 0.30) | 0.58 |
| AgeAccelPheno    | 6.77 | 1     | -0.01 (-0.41, 0.39) | 0.95 |
|                  |      | 2     | -0.05 (-0.45, 0.36) | 0.82 |
|                  |      | 3     | -0.08 (-0.48, 0.32) | 0.70 |
|                  |      | 4     | -0.19 (-0.63, 0.26) | 0.41 |
| DunedinPACE      | 0.10 | 1     | 0.17 (-0.24, 0.57)  | 0.42 |
|                  |      | 2     | 0.26 (-0.15, 0.66)  | 0.22 |
|                  |      | 3     | 0.19 (-0.23, 0.60)  | 0.38 |
|                  |      | 4     | 0.11 (-0.36, 0.58)  | 0.64 |
| AgeAccelGrim2    | 4.15 | 1     | 0.34 (-0.06, 0.75)  | 0.10 |
|                  |      | 2     | 0.44 (0.04, 0.85)   | 0.03 |
|                  |      | 3     | 0.30 (-0.16, 0.76)  | 0.20 |
|                  |      | 4     | 0.38 (-0.17, 0.93)  | 0.18 |

Abbreviations: SD, standard deviation; IEAA, intrinsic epigenetic age acceleration; EEAA, extrinsic epigenetic age acceleration; AgeAccelPheno, phenotypic age acceleration; DunedinPACE, Dunedin Pace of Aging calculated from the Epigenome; AgeAccelGrim2, accelerated DNA methylation GrimAge version 2. Model 1 adjusted for age. Model 2 adjusted for age, race, and ethnicity. Model 3 adjusted for age, race, ethnicity, hormone trial arm, education, and smoking status. Model 4 adjusted for age, race, ethnicity, hormone trial arm, education, smoking status, physical activity, body mass index, diabetes, cardiovascular disease, non-melanoma cancer, and blood cell composition. For IEAA or EEAA, blood cell composition was not included in the fully adjusted model (see text).

**Supplementary Table 3. Associations of each epigenetic clock with the ln(AD-PS+1) score.**

| Epigenetic clock | SD   | Model | $\beta$ (95% CI)          | p     |
|------------------|------|-------|---------------------------|-------|
| IEAA             | 5.05 | 1     | -0.0017 (-0.0101, 0.0068) | 0.70  |
|                  |      | 2     | -0.0015 (-0.0100, 0.0070) | 0.73  |
|                  |      | 3     | -0.0024 (-0.0108, 0.0060) | 0.58  |
|                  |      | 4     | -0.0025 (-0.0109, 0.0059) | 0.56  |
| EEAA             | 6.15 | 1     | 0.0043 (-0.0041, 0.0128)  | 0.31  |
|                  |      | 2     | 0.0053 (-0.0032, 0.0139)  | 0.22  |
|                  |      | 3     | 0.0059 (-0.0026, 0.0144)  | 0.17  |
|                  |      | 4     | 0.0054 (-0.0031, 0.0140)  | 0.21  |
| AgeAccelPheno    | 6.77 | 1     | 0.0045 (-0.0040, 0.0129)  | 0.30  |
|                  |      | 2     | 0.0048 (-0.0037, 0.0133)  | 0.27  |
|                  |      | 3     | 0.0038 (-0.0046, 0.0122)  | 0.37  |
|                  |      | 4     | 0.0040 (-0.0053, 0.0132)  | 0.40  |
| DunedinPACE      | 0.10 | 1     | 0.0051 (-0.0034, 0.0135)  | 0.24  |
|                  |      | 2     | 0.0042 (-0.0044, 0.0127)  | 0.34  |
|                  |      | 3     | 0.0027 (-0.0059, 0.0113)  | 0.53  |
|                  |      | 4     | 0.0032 (-0.0066, 0.0131)  | 0.52  |
| AgeAccelGrim2    | 4.15 | 1     | 0.0152 (0.0068, 0.0237)   | <0.01 |
|                  |      | 2     | 0.0144 (0.0059, 0.0229)   | <0.01 |
|                  |      | 3     | 0.0112 (0.0016, 0.0207)   | 0.02  |
|                  |      | 4     | 0.0151 (0.0035, 0.0266)   | 0.01  |

Abbreviations: SD, standard deviation; IEAA, intrinsic epigenetic age acceleration; EEAA, extrinsic epigenetic age acceleration; AgeAccelPheno, phenotypic age acceleration; DunedinPACE, Dunedin Pace of Aging calculated from the Epigenome; AgeAccelGrim2, accelerated DNA methylation GrimAge version 2. Model 1 adjusted for age. Model 2 adjusted for age, race, and ethnicity. Model 3 adjusted for age, race, ethnicity, hormone trial arm, education, and smoking status. Model 4 adjusted for age, race, ethnicity, hormone trial arm, education, smoking status, physical activity, body mass index, diabetes, cardiovascular disease, non-melanoma cancer, and blood cell composition. For IEAA or EEAA, blood cell composition was not included in the fully adjusted model (see text).

**Supplementary Table 4. Associations of each epigenetic clock with the ln(AD-PS+1) score after excluding the 46 women with MCI/dementia at the MRI visit.**

| <b>EpiAgeAccel</b> | <b>SD</b> | <b>Model</b> | <b><math>\beta</math> (95% CI)</b> | <b>p</b> |
|--------------------|-----------|--------------|------------------------------------|----------|
| IEAA               | 5.04      | 1            | -0.0013 (-0.0098, 0.0072)          | 0.76     |
|                    |           | 2            | -0.0008 (-0.0093, 0.0078)          | 0.86     |
|                    |           | 3            | -0.0015 (-0.0099, 0.0069)          | 0.73     |
|                    |           | 4            | -0.0017 (-0.0101, 0.0068)          | 0.70     |
| EEAA               | 6.11      | 1            | 0.0033 (-0.0052, 0.0117)           | 0.45     |
|                    |           | 2            | 0.0045 (-0.0040, 0.0130)           | 0.30     |
|                    |           | 3            | 0.0053 (-0.0031, 0.0138)           | 0.22     |
|                    |           | 4            | 0.0050 (-0.0035, 0.0135)           | 0.25     |
| AgeAccelPheno      | 6.73      | 1            | 0.0049 (-0.0035, 0.0134)           | 0.25     |
|                    |           | 2            | 0.0055 (-0.0030, 0.0140)           | 0.20     |
|                    |           | 3            | 0.0048 (-0.0037, 0.0132)           | 0.27     |
|                    |           | 4            | 0.0054 (-0.0038, 0.0146)           | 0.25     |
| DunedinPACE        | 0.10      | 1            | 0.0040 (-0.0044, 0.0125)           | 0.35     |
|                    |           | 2            | 0.0033 (-0.0052, 0.0118)           | 0.45     |
|                    |           | 3            | 0.0019 (-0.0066, 0.0105)           | 0.66     |
|                    |           | 4            | 0.0016 (-0.0082, 0.0114)           | 0.75     |
| AgeAccelGrim2      | 4.14      | 1            | 0.0158 (0.0074, 0.0243)            | <0.01    |
|                    |           | 2            | 0.0150 (0.0065, 0.0236)            | <0.01    |
|                    |           | 3            | 0.0124 (0.0029, 0.0220)            | 0.01     |
|                    |           | 4            | 0.0163 (0.0048, 0.0277)            | <0.01    |

Abbreviations: SD, standard deviation; IEAA, intrinsic epigenetic age acceleration; EEAA, extrinsic epigenetic age acceleration; AgeAccelPheno, phenotypic age acceleration; DunedinPACE, Dunedin Pace of Aging calculated from the Epigenome; AgeAccelGrim2, accelerated DNA methylation GrimAge version 2. Model 1 adjusted for age. Model 2 adjusted for age, race, and ethnicity. Model 3 adjusted for age, race, ethnicity, hormone trial arm, education, and smoking status. Model 4 adjusted for age, race, ethnicity, hormone trial arm, education, smoking status, physical activity, body mass index, diabetes, cardiovascular disease, non-melanoma cancer, and blood cell composition. For IEAA or EEAA, blood cell composition was not included in the fully adjusted model (see text).

**Supplementary Table 5. Associations of each epigenetic clock with SPARE-BAA stratified by APOE ε4 carrier status.**

| EpiAgeAccel   | Model | Carrier |                     | Non-carrier |                     | P interaction |
|---------------|-------|---------|---------------------|-------------|---------------------|---------------|
|               |       | SD      | β (95% CI)          | SD          | β (95% CI)          |               |
| IEAA          | 1     | 4.71    | 0.60 (-0.34, 1.53)  | 5.14        | -0.29 (-0.77, 0.19) | 0.09          |
|               | 2     |         | 0.54 (-0.40, 1.47)  |             | -0.33 (-0.81, 0.15) | 0.10          |
|               | 3     |         | 0.56 (-0.39, 1.51)  |             | -0.31 (-0.79, 0.17) | 0.11          |
| EEAA          | 1     | 6.39    | -0.28 (-1.23, 0.67) | 6.02        | 0.07 (-0.41, 0.55)  | 0.59          |
|               | 2     |         | -0.35 (-1.31, 0.60) |             | 0.06 (-0.42, 0.54)  | 0.52          |
|               | 3     |         | -0.33 (-1.31, 0.65) |             | 0.02 (-0.47, 0.50)  | 0.57          |
| AgeAccelPheno | 1     | 6.62    | -0.23 (-1.17, 0.71) | 6.77        | 0.01 (-0.47, 0.49)  | 0.72          |
|               | 2     |         | -0.42 (-1.38, 0.54) |             | -0.02 (-0.50, 0.46) | 0.66          |
|               | 3     |         | 0.00 (-1.05, 1.05)  |             | -0.26 (-0.79, 0.26) | 0.78          |
| DunedinPACE   | 1     | 0.11    | 0.07 (-0.87, 1.01)  | 0.10        | 0.38 (-0.10, 0.86)  | 0.56          |
|               | 2     |         | -0.08 (-1.06, 0.90) |             | 0.33 (-0.16, 0.82)  | 0.56          |
|               | 3     |         | -0.23 (-1.33, 0.87) |             | 0.22 (-0.34, 0.78)  | 0.45          |
| AgeAccelGrim2 | 1     | 3.96    | 0.13 (-0.81, 1.06)  | 4.05        | 0.58 (0.10, 1.06)   | 0.37          |
|               | 2     |         | -0.37 (-1.48, 0.73) |             | 0.52 (-0.02, 1.07)  | 0.30          |
|               | 3     |         | 0.08 (-1.26, 1.42)  |             | 0.48 (-0.18, 1.13)  | 0.30          |

Abbreviations: SD, standard deviation; IEAA, intrinsic epigenetic age acceleration; EEAA, extrinsic epigenetic age acceleration; AgeAccelPheno, phenotypic age acceleration; DunedinPACE, Dunedin Pace of Aging calculated from the Epigenome; AgeAccelGrim2, accelerated DNA methylation GrimAge version 2. Model 1 adjusted for age. Model 2 adjusted for age, race, and ethnicity. Model 3 adjusted for age, race, ethnicity, hormone trial arm, education, and smoking status. Model 4 adjusted for age, race, ethnicity, hormone trial arm, education, smoking status, physical activity, body mass index, diabetes, cardiovascular disease, non-melanoma cancer, and blood cell composition. For IEAA or EEAA, blood cell composition was not included in the fully adjusted model (see text).

P-interactions were obtained from likelihood ratio test comparing the main effects model with a model including the interaction term between scaled epigenetic clock and APOE ε4 carrier status.

**Supplementary Table 6. Associations of each epigenetic clock with the ln(AD-PS+1) score stratified by APOE ε4 carrier status.**

| EAA           | Model | Carrier |                           | Non-carrier |                           | P interaction |
|---------------|-------|---------|---------------------------|-------------|---------------------------|---------------|
|               |       | SD      | β (95% CI)                | SD          | β (95% CI)                |               |
| IEAA          | 1     | 4.71    | 0.0017 (-0.0188, 0.0222)  | 5.14        | -0.0001 (-0.0102, 0.0099) | 0.87          |
|               | 2     |         | 0.0003 (-0.0204, 0.0209)  |             | -0.0013 (-0.0113, 0.0086) | 0.81          |
|               | 3     |         | 0.0001 (-0.0209, 0.0211)  |             | -0.0008 (-0.0108, 0.0091) | 0.88          |
| EEAA          | 1     | 6.39    | 0.0162 (-0.0044, 0.0369)  | 6.02        | 0.0034 (-0.0066, 0.0135)  | 0.30          |
|               | 2     |         | 0.0167 (-0.0042, 0.0377)  |             | 0.0039 (-0.0061, 0.0138)  | 0.28          |
|               | 3     |         | 0.0169 (-0.0045, 0.0383)  |             | 0.0028 (-0.0072, 0.0128)  | 0.25          |
| AgeAccelPheno | 1     | 6.62    | 0.0011 (-0.0195, 0.0217)  | 6.77        | 0.0073 (-0.0028, 0.0173)  | 0.57          |
|               | 2     |         | -0.0014 (-0.0225, 0.0197) |             | 0.0058 (-0.0042, 0.0157)  | 0.69          |
|               | 3     |         | -0.0015 (-0.0255, 0.0224) |             | 0.0047 (-0.0061, 0.0155)  | 0.79          |
| DunedinPACE   | 1     | 0.11    | 0.0015 (-0.0191, 0.0221)  | 0.10        | 0.0040 (-0.0061, 0.0141)  | 0.80          |
|               | 2     |         | -0.0042 (-0.0257, 0.0172) |             | 0.0032 (-0.0069, 0.0133)  | 0.75          |
|               | 3     |         | -0.0074 (-0.0325, 0.0177) |             | 0.0032 (-0.0084, 0.0148)  | 0.65          |
| AgeAccelGrim2 | 1     | 3.96    | 0.0196 (-0.0008, 0.0400)  | 4.05        | 0.0131 (0.0030, 0.0232)   | 0.53          |
|               | 2     |         | 0.0111 (-0.0132, 0.0353)  |             | 0.0099 (-0.0013, 0.0212)  | 0.57          |
|               | 3     |         | 0.0112 (-0.0193, 0.0418)  |             | 0.0129 (-0.0006, 0.0264)  | 0.54          |

Abbreviations: SD, standard deviation; IEAA, intrinsic epigenetic age acceleration; EEAA, extrinsic epigenetic age acceleration; AgeAccelPheno, phenotypic age acceleration; DunedinPACE, Dunedin Pace of Aging calculated from the Epigenome; AgeAccelGrim2, accelerated DNA methylation GrimAge version 2. Model 1 adjusted for age. Model 2 adjusted for age, race, and ethnicity. Model 3 adjusted for age, race, ethnicity, hormone trial arm, education, and smoking status. Model 4 adjusted for age, race, ethnicity, hormone trial arm, education, smoking status, physical activity, body mass index, diabetes, cardiovascular disease, non-melanoma cancer, and blood cell composition. For IEAA or EEAA, blood cell composition was not included in the fully adjusted model (see text).

P-interactions were obtained from likelihood ratio test comparing the main effects model with a model including the interaction term between scaled epigenetic clock and APOE ε4 carrier status.

**Supplementary Table 7. Associations of each epigenetic clock with SPARE-BAA adjusted for time interval since baseline.**

| Epigenetic clock | SD   | Model | $\beta$ (95% CI)    | p    |
|------------------|------|-------|---------------------|------|
| IEAA             | 5.05 | 1     | -0.06 (-0.46, 0.34) | 0.78 |
|                  |      | 2     | -0.10 (-0.51, 0.30) | 0.62 |
|                  |      | 3     | -0.13 (-0.54, 0.28) | 0.53 |
|                  |      | 4     | -0.13 (-0.53, 0.28) | 0.55 |
| EEAA             | 6.15 | 1     | -0.03 (-0.44, 0.37) | 0.88 |
|                  |      | 2     | -0.10 (-0.51, 0.31) | 0.62 |
|                  |      | 3     | -0.11 (-0.52, 0.30) | 0.59 |
|                  |      | 4     | -0.14 (-0.55, 0.28) | 0.52 |
| AgeAccelPheno    | 6.77 | 1     | -0.04 (-0.44, 0.37) | 0.86 |
|                  |      | 2     | -0.07 (-0.47, 0.34) | 0.74 |
|                  |      | 3     | -0.10 (-0.51, 0.31) | 0.63 |
|                  |      | 4     | -0.19 (-0.63, 0.26) | 0.41 |
| DunedinPACE      | 0.10 | 1     | 0.14 (-0.26, 0.55)  | 0.48 |
|                  |      | 2     | 0.24 (-0.17, 0.65)  | 0.26 |
|                  |      | 3     | 0.17 (-0.25, 0.58)  | 0.43 |
|                  |      | 4     | 0.11 (-0.36, 0.58)  | 0.65 |
| AgeAccelGrim2    | 4.15 | 1     | 0.32 (-0.09, 0.72)  | 0.13 |
|                  |      | 2     | 0.42 (0.01, 0.83)   | 0.05 |
|                  |      | 3     | 0.27 (-0.19, 0.74)  | 0.25 |
|                  |      | 4     | 0.37 (-0.18, 0.92)  | 0.19 |

Abbreviations: SD, standard deviation; IEAA, intrinsic epigenetic age acceleration; EEAA, extrinsic epigenetic age acceleration; AgeAccelPheno, phenotypic age acceleration; DunedinPACE, Dunedin Pace of Aging calculated from the Epigenome; AgeAccelGrim2, accelerated DNA methylation GrimAge version 2. Model 1 adjusted for age and time between blood draw and MRI assessment. Model 2 adjusted for age, time interval between blood draw and MRI assessment, race, and ethnicity. Model 3 adjusted for age, time interval between blood draw and MRI assessment, race, ethnicity, hormone trial arm, education, and smoking status. Model 4 adjusted for age, time interval between blood draw and MRI assessment, race, ethnicity, hormone trial arm, education, smoking status, physical activity, body mass index, diabetes, cardiovascular disease, non-melanoma cancer, and blood cell composition. For IEAA or EEAA, blood cell composition was not included in the fully adjusted model (see text).

**Supplementary Table 8. Associations of each epigenetic clock with the ln(AD-PS+1) score adjusted for time interval since baseline.**

| Epigenetic clock | SD   | Model | $\beta$ (95% CI)          | p     |
|------------------|------|-------|---------------------------|-------|
| IEAA             | 5.05 | 1     | -0.0020 (-0.0104, 0.0064) | 0.64  |
|                  |      | 2     | -0.0020 (-0.0105, 0.0065) | 0.65  |
|                  |      | 3     | -0.0030 (-0.0114, 0.0055) | 0.49  |
|                  |      | 4     | -0.0031 (-0.0115, 0.0054) | 0.48  |
| EEAA             | 6.15 | 1     | 0.0054 (-0.0030, 0.0139)  | 0.21  |
|                  |      | 2     | 0.0064 (-0.0021, 0.0150)  | 0.14  |
|                  |      | 3     | 0.0071 (-0.0014, 0.0155)  | 0.10  |
|                  |      | 4     | 0.0066 (-0.0019, 0.0151)  | 0.13  |
| AgeAccelPheno    | 6.77 | 1     | 0.0056 (-0.0028, 0.0141)  | 0.19  |
|                  |      | 2     | 0.0059 (-0.0026, 0.0144)  | 0.17  |
|                  |      | 3     | 0.0050 (-0.0034, 0.0134)  | 0.24  |
|                  |      | 4     | 0.0040 (-0.0052, 0.0132)  | 0.39  |
| DunedinPACE      | 0.10 | 1     | 0.0061 (-0.0023, 0.0146)  | 0.16  |
|                  |      | 2     | 0.0053 (-0.0033, 0.0138)  | 0.23  |
|                  |      | 3     | 0.0039 (-0.0047, 0.0125)  | 0.38  |
|                  |      | 4     | 0.0034 (-0.0064, 0.0132)  | 0.50  |
| AgeAccelGrim2    | 4.15 | 1     | 0.0169 (0.0085, 0.0254)   | <0.01 |
|                  |      | 2     | 0.0161 (0.0075, 0.0247)   | <0.01 |
|                  |      | 3     | 0.0132 (0.0036, 0.0228)   | <0.01 |
|                  |      | 4     | 0.0155 (0.0041, 0.0270)   | <0.01 |

Abbreviations: SD, standard deviation; IEAA, intrinsic epigenetic age acceleration; EEAA, extrinsic epigenetic age acceleration; AgeAccelPheno, phenotypic age acceleration; DunedinPACE, Dunedin Pace of Aging calculated from the Epigenome; AgeAccelGrim2, accelerated DNA methylation GrimAge version 2. Model 1 adjusted for age and time between blood draw and MRI assessment. Model 2 adjusted for age, time interval between blood draw and MRI assessment, race, and ethnicity. Model 3 adjusted for age, time interval between blood draw and MRI assessment, race, ethnicity, hormone trial arm, education, and smoking status. Model 4 adjusted for age, time interval between blood draw and MRI assessment, race, ethnicity, hormone trial arm, education, smoking status, physical activity, body mass index, diabetes, cardiovascular disease, non-melanoma cancer, and blood cell composition. For IEAA or EEAA, blood cell composition was not included in the fully adjusted model (see text).
